# Supplementary material for: Influence of Keratoconus Severity on Detecting True Progression with Scheimpflug Imaging and Anterior Segment Optical Coherence Tomography
Source: MDPI journal article supplement (doi:10.3390/life13071474), 2023-06-29
Supplement: s1 [file s1]

**Supplementary Table S1**

| <b>Group</b>    | <b>N eyes / N patients</b> | <b>Mean age <math>\pm</math> SD<br/>(range)</b> | <b>Gender (Men/Women)</b> |
|-----------------|----------------------------|-------------------------------------------------|---------------------------|
| Control         | 20 / 20                    | 33.5 $\pm$ 9.6<br>(19 to 52)                    | 13 / 7                    |
| All keratoconus | 61 / 43                    | 34.5 $\pm$ 13.0<br>(20 to 66)                   | 30 / 13                   |
| Mild KC         | 16 / 16                    | 34.9 $\pm$ 12.5<br>(20 to 61)                   | 13 / 3                    |
| Moderate KC     | 25 / 22                    | 33.4 $\pm$ 9.9<br>(20 to 60)                    | 16 / 6                    |
| Severe KC       | 20 / 16                    | 33.9 $\pm$ 11.7<br>(20 to 66)                   | 11 / 5                    |
